# Supplementary material
Source: PubMed Central journal article supplement (PMC3634682)
Supplement: supp_tpc.112.107904_tpc107904SupplementalData.pdf [file supp_tpc.112.107904_tpc107904SupplementalData.pdf]

# Supplemental Figure 1

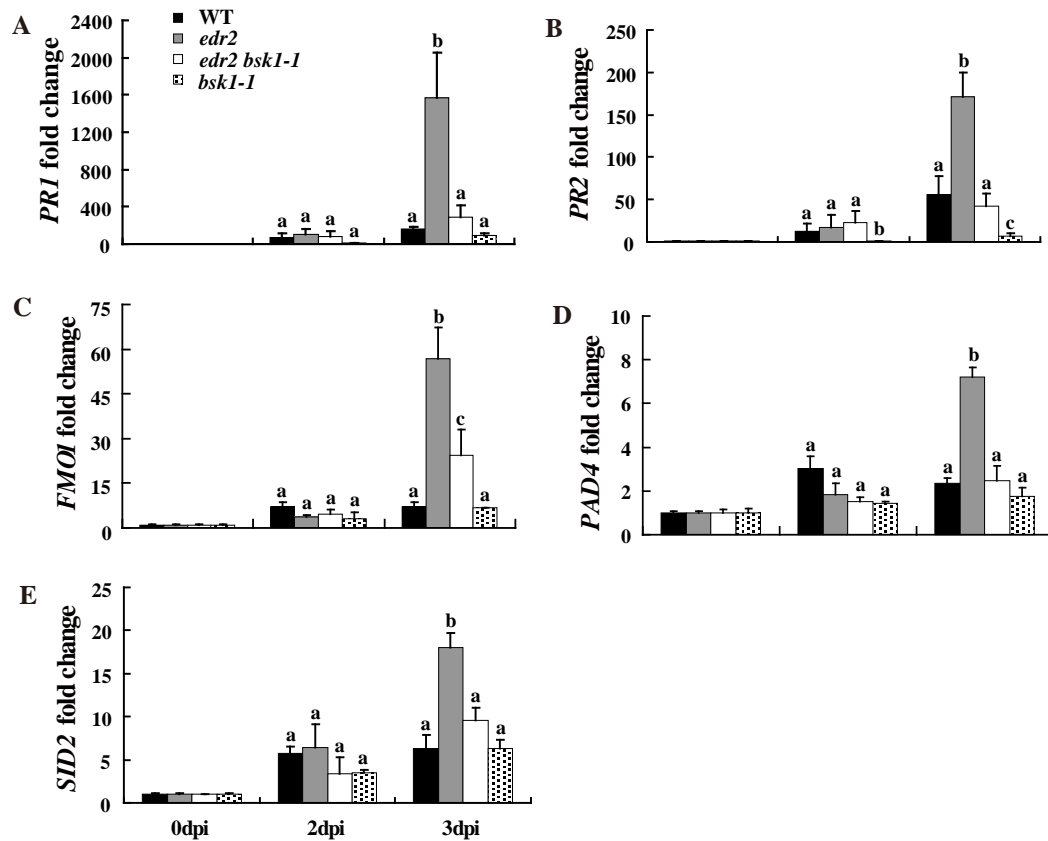

## Supplemental Figure 1. *bsk1-1* affects *edr2*-mediated changes in gene expression.

The transcript accumulation of defense-related genes were examined by quantitative real-time PCR. Leaves were detached from plants for RNA isolation at different time points (day 0, 2 and 3) after infection with *G. cichoracearum*. (A) *PR1*, (B) *PR2*, (C) *FMO1*, (D) *PAD4*, (E) *SID2*. The relative fold change of transcript accumulation was calculated relative to uninoculated control plants (day 0) at the indicated time points. Bars represent standard deviation of values obtained from three independent biological samples per genotype and time point. Three technical replicates per biological samples were also examined in the experiment. Lower-case letters indicate statistically significant differences (P<0.05; one-way ANOVA). WT, wild type.

Supplemental Figure 2

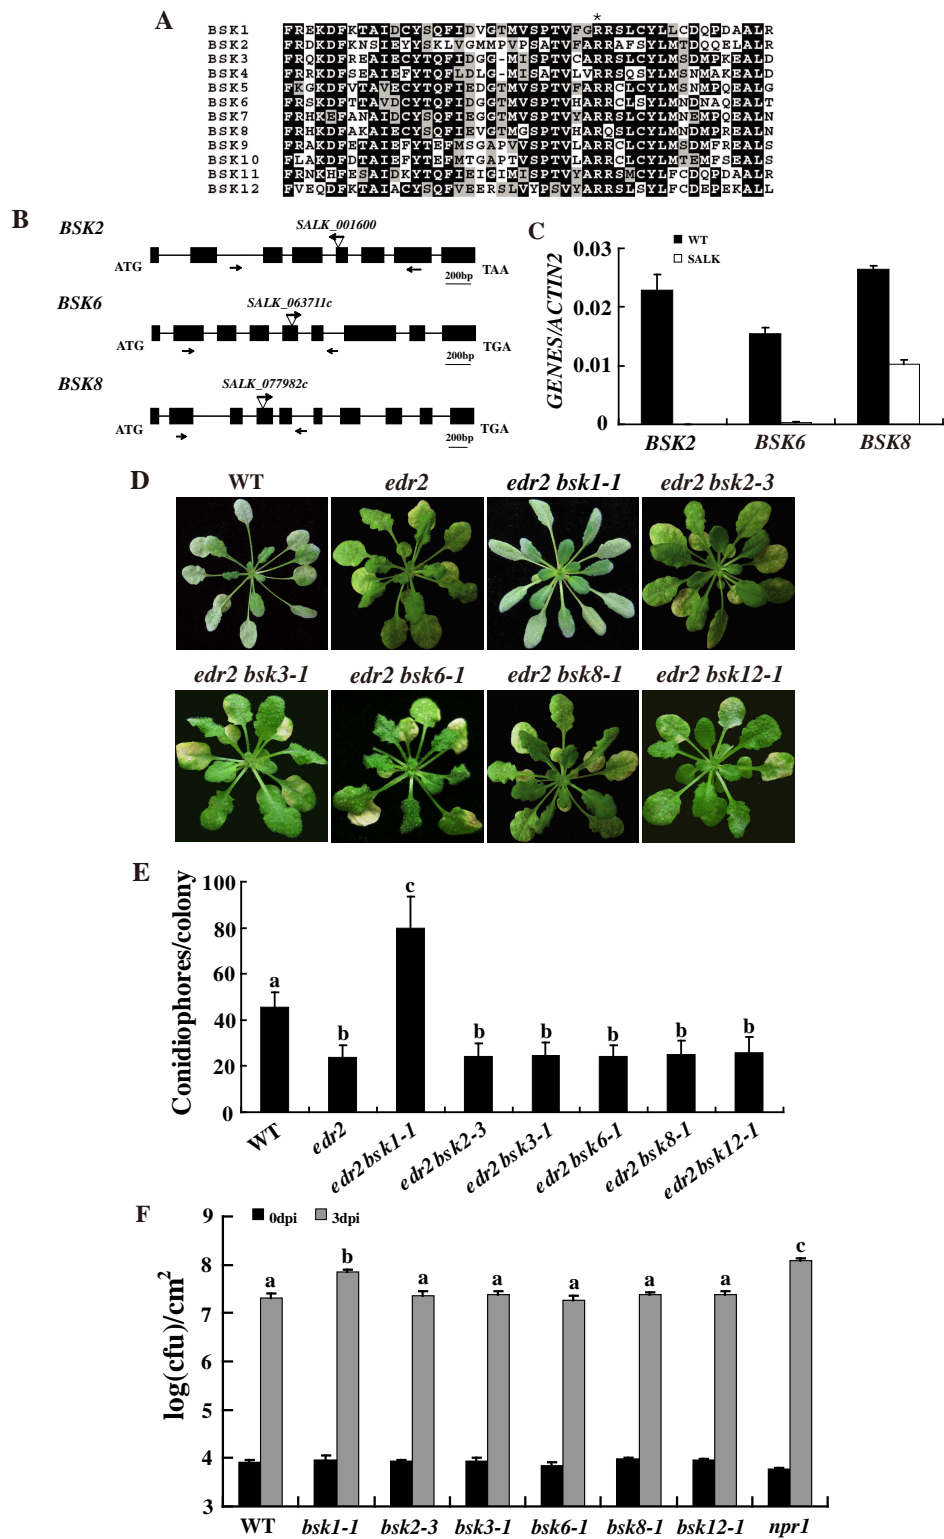

Supplemental Figure 2. T-DNA insertion mutations of *BSK1* homologs did not suppress *edr2*-mediated powdery mildew resistance, and mutants of *BSK1* homologs displayed wild type like responses to *Pto* DC3000.

(A) Alignment of the BSK1 TPR domain with the most similar BSK1 homologs in Arabidopsis. The mutation site (asterisk) of *bsk1-1* (R443) is highly conserved in the BSK1 protein family.

(B) T-DNA insertion sites are indicated by arrows and triangles. The positions of the primers used to examine transcript levels were indicated by arrows.

(C) Relative expression levels were examined by Real time PCR. *ACTIN2* was used as the internal control. Error bars represent standard deviation of values obtained from three independent biological samples.

(D) Four-week-old plants of the indicated genotypes were inoculated with *G. cichoracearum* and photographed at 8 dpi.

(E) The number of conidiophores per colony was counted at 5 dpi. Bars represent mean and standard deviation (n>30). Statistically significant differences are indicated by lower-case letters (P<0.01; one-way ANOVA). Experiments were repeated three times with similar results.

(F) Four-week-old plants were inoculated with 5x10<sup>5</sup>cfu/ml of *Pto* DC3000. The bacterial growth was counted at 3 dpi. Statistically significant differences are indicated by lower-case letters (P<0.01, one-way ANOVA). The experiments were repeated three times with similar results.

### Supplemental Figure 3

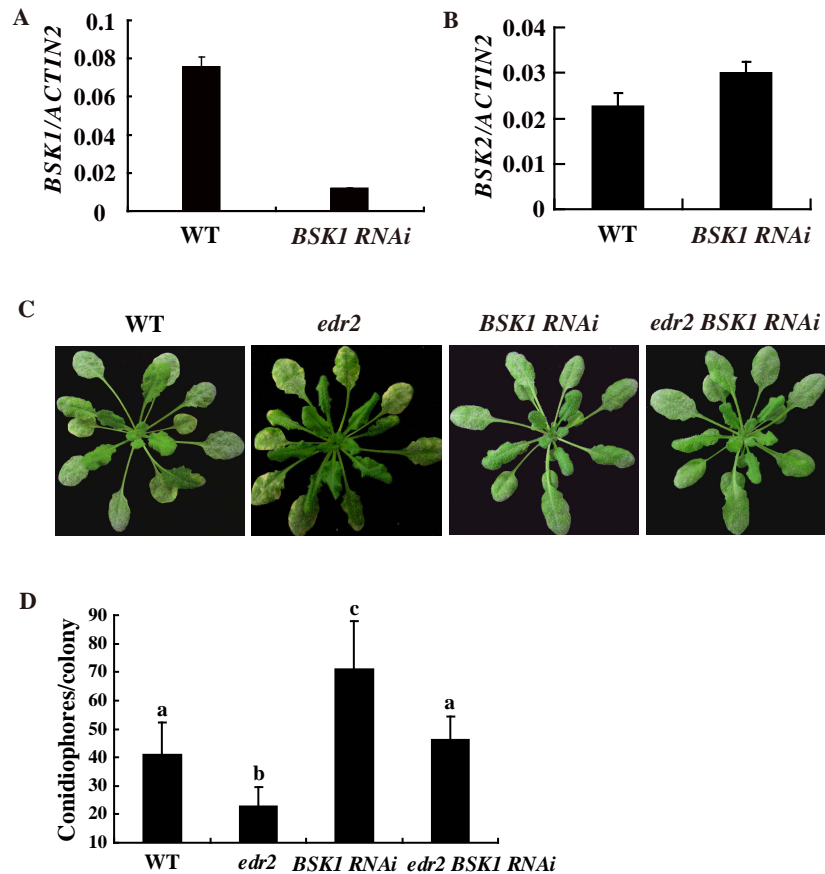

#### Supplemental Figure 3. *BSK1* RNAi lines displayed a similar phenotype to *bsk1-1*.

(A) The accumulation of *BSK1* transcripts in *BSK1* RNAi T2 lines was examined by quantitative Real-time PCR. *ACTIN2* was used as the internal control. Error bars represent standard deviation of values obtained from three independent biological samples. WT, wild type.

(B) Accumulation of *BSK2* transcripts was examined by quantitative real time PCR. *ACTIN2* was used as the internal control. Error bars represent standard deviation of values obtained from three independent biological samples. The expression levels of *BSK2* in *BSK1* RNAi transgenic plants were similar to those in wild-type plants, indicating that the *BSK1* RNAi construct was specific to *BSK1*.

(C) Four-week-old plants were inoculated with *G. cichoracearum* and photographed at 8 dpi.

(D) The number of conidiophores per colony in the infected leaves was counted at 5 dpi. Bars represent mean and standard deviation (n>30). Lower-case letters indicate statistically significant differences (P<0.01; one-way ANOVA). Experiments were repeated three times with similar results.

### Supplemental Figure 4

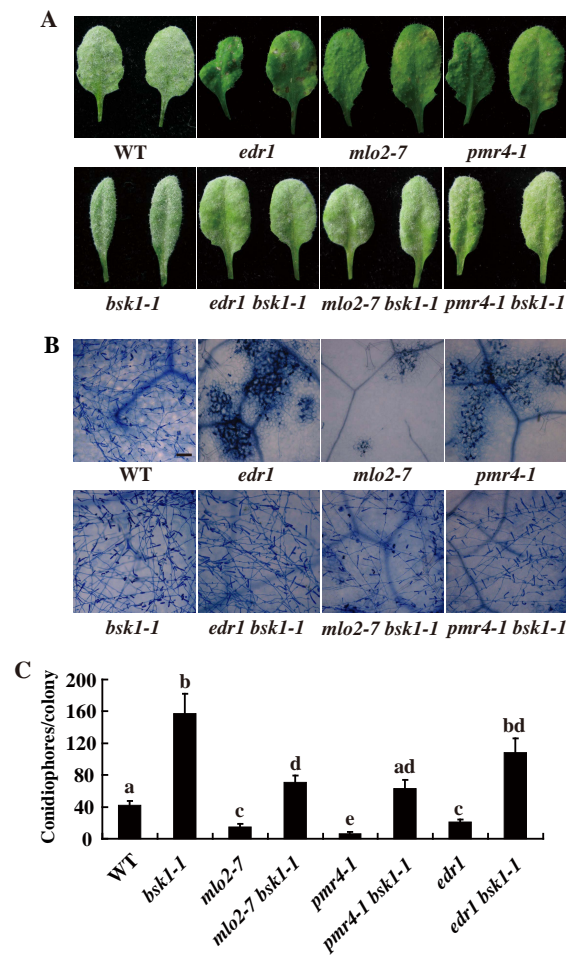

#### Supplemental Figure 4. The *bsk1-1* mutation suppresses *edr1* and *pmr4*, *mlo2*-mediated powdery mildew resistance phenotypes.

(A) Four-week-old plants were infected with *G. cichoracearum*. Leaves were detached and photographed at 8 dpi. The *edr1*, *pmr4* and *mlo2* mutants were resistant and displayed mildew-induced cell death, but the *edr1 bsk1-1*, *pmr4 bsk1-1* and *mlo2 bsk1-1* mutants showed abundant conidiophores and lacked necrotic lesions. WT, wild type.

(B) Fungal structures on the surface of leaves and dead plant cells at 8 dpi were visualized by trypan blue staining. Very few fungal spores were produced on *edr1*, *pmr4* and *mlo2*, but a large number of conidia were produced on *edr1 bsk1-1*, *pmr4 bsk1-1* and *mlo2 bsk1-1*. Bar=100  $\mu$ m.

(C) Quantitative assessment of fungal growth in plants as indicated in (A) by counting the number of conidiophores per colony at 5 dpi. Data represent mean and standard deviation (n>30). Significant differences are indicated by lower case letters (P<0.01; one-way ANOVA). The experiments were repeated three times with similar results.

### Supplemental Figure 5

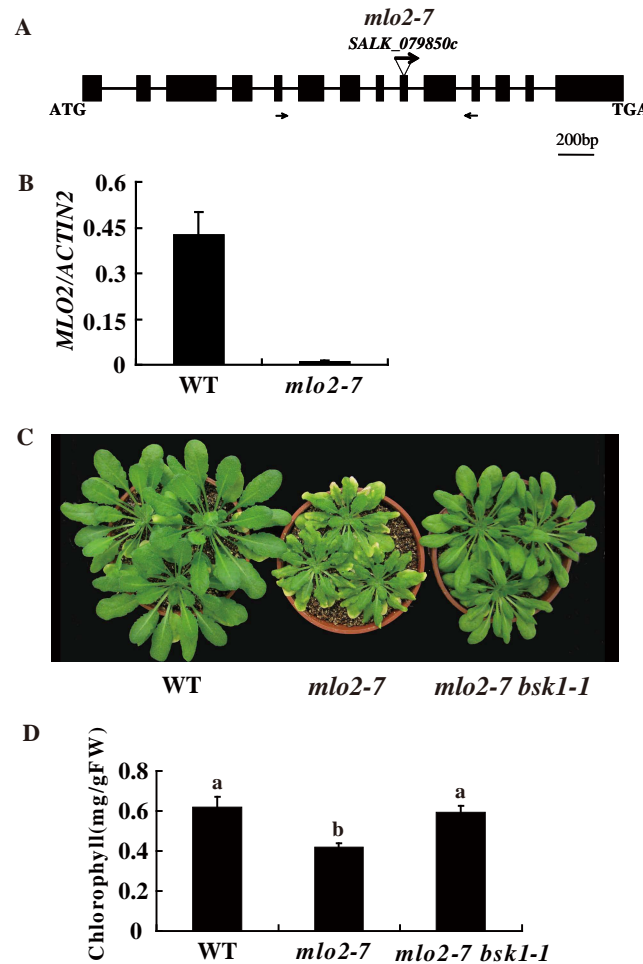

#### Supplemental Figure 5. The *bsk1-1* mutation partially suppresses *mlo2*-mediated senescence.

(A) The T-DNA insertion site in the *mlo2-7* mutant is indicated by an arrow and triangle. The positions of the primers used to check transcript levels were indicated by arrows.

(B) The accumulation of *MLO2* transcript was examined by quantitative real time PCR. *ACTIN2* was used as the internal control. Error bars represent standard deviation of values obtained from three independent biological samples. WT, wild type.

(C) Eight-week-old plants grown under standard short-day growth conditions were photographed.

(D) Quantification of chlorophyll content in leaves of the genotype shown in (C). Data represent mean and standard deviation (n=3). Lower case letters indicate statistically significant differences ( $P < 0.01$ ; one-way ANOVA). The experiments were repeated three times with similar results.

### Supplemental Figure 6

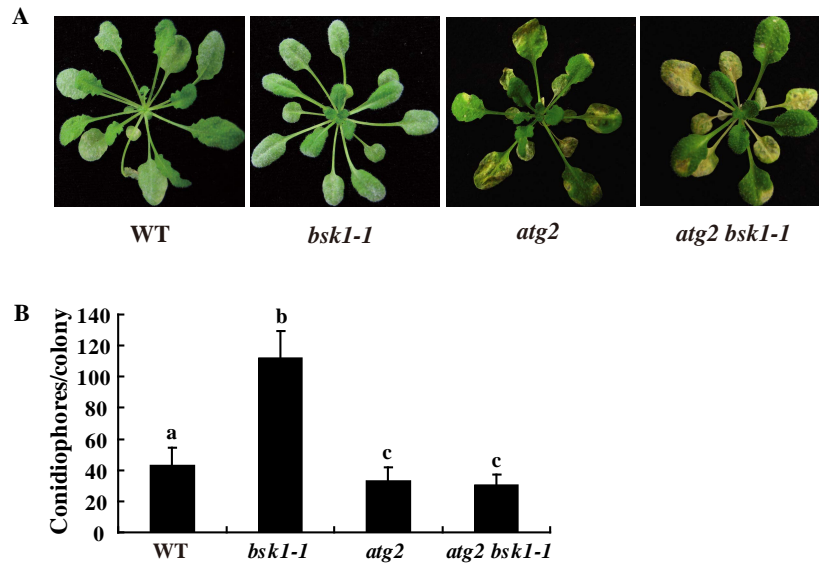

**Supplemental Figure 6. The *bsk1-1* mutation did not suppress *atg2*-mediated powdery mildew resistance and cell death phenotypes.**

**(A)** Four-week-old plants were infected with *G. cichoracearum* and photographed at 8 dpi. WT, wild type.

**(B)** Quantification of fungal growth of the genotype shown in **(A)** by counting the number of conidiophores per colony at 5 dpi. Bars represent mean and standard deviation (n>30). Statistically significant differences are indicated by lower case letters (P< 0.01; one-way ANOVA). Experiments were repeated three times with similar results.

**Supplemental Figure 7**

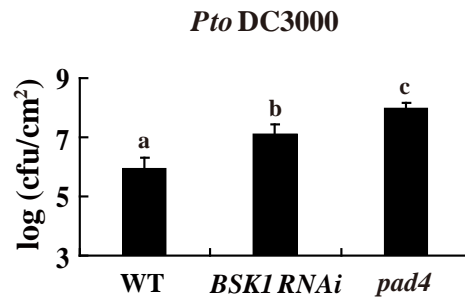

**Supplemental Figure 7. The *BSK1 RNAi* plants displayed enhanced susceptibility to *Pto* DC3000.**

Four-week-old plants were inoculated with  $5 \times 10^5$  cfu/ml of *Pto* DC3000 and bacterial growth was measured at 3 dpi. Statistically significant differences are indicated by lower case letters ( $P < 0.01$ ; one-way ANOVA). The experiments were repeated three times with similar results. WT, wild type.

### Supplemental Figure 8

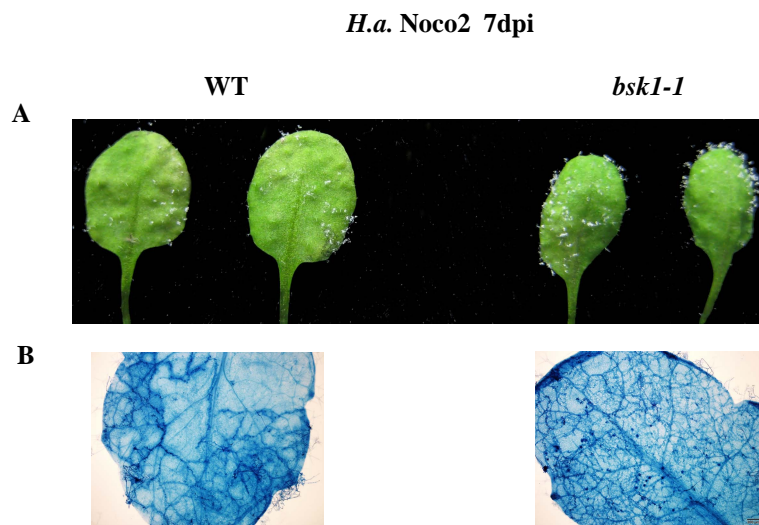

**Supplemental Figure 8. The phenotype of *bsk1-1* in response to *H. a. Noco2*.**

Two-week-old Arabidopsis plants were infected with *H. a. Noco2*.

**(A)** Infected leaves were removed and photographed at 7 dpi. WT, wild type.

**(B)** Infected leaves at 7 dpi were stained with trypan blue.

Supplemental Figure 9

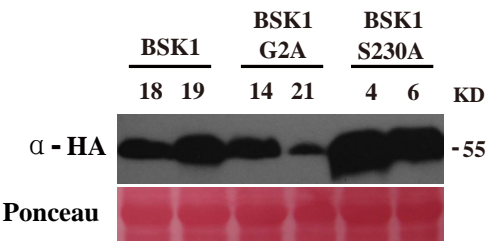

Supplemental Figure 9. Transgenic plants expressed correct-sized fusion proteins.

Total protein was extracted from leaves of four-week-old plants. The total protein was separated by SDS-PAGE gel and subjected to immunoblot analysis with anti-HA antibody (upper panel). Ponceau S staining of Rubisco is shown as a loading control (lower panel).

### Supplemental Figure 10

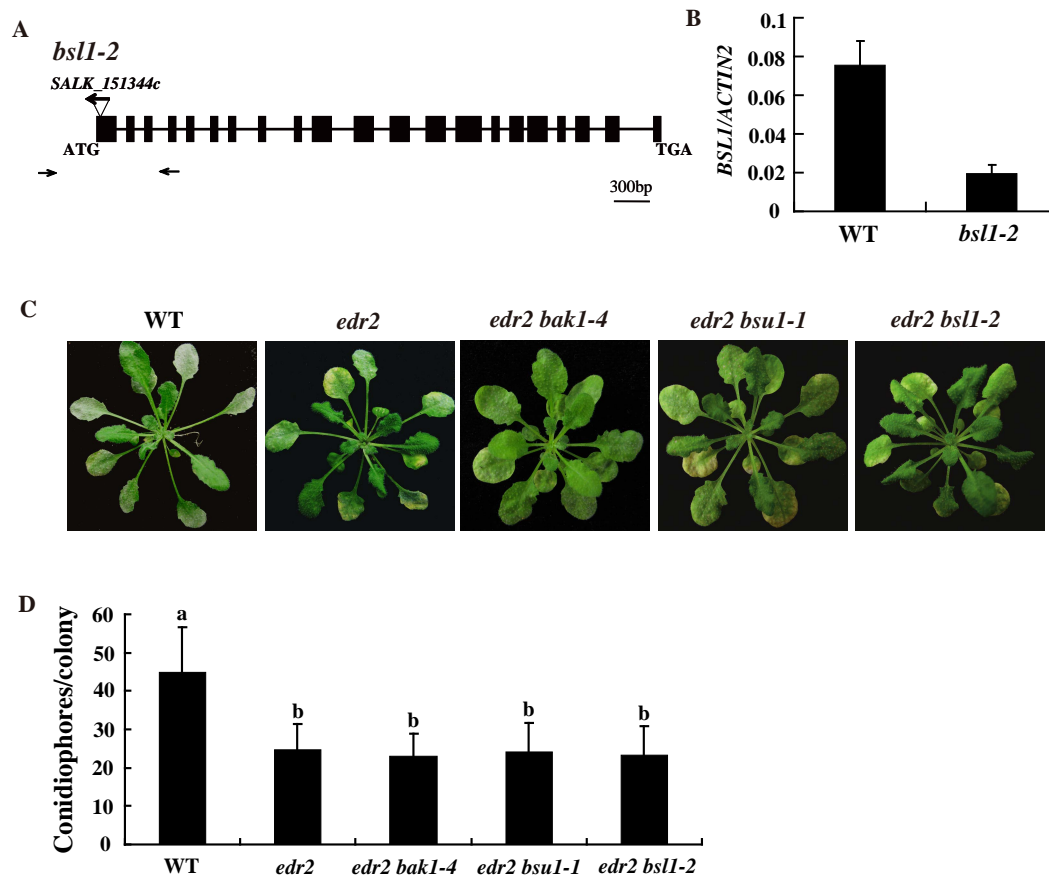

#### Supplemental Figure 10. The *bak1*, *bsu1* and *bsl1* mutations did not suppress *edr2*-mediated powdery mildew resistance phenotypes.

(A) The T-DNA insertion site in *bsl1-2* is indicated by an arrow and triangle. The positions of the primers used to check transcript levels were indicated by arrows.

(B) The accumulation of *BSL1* transcripts in *bsl1-2* was examined by quantitative real-time PCR. *ACTIN2* was used as the internal control. Error bars represent standard deviation of values obtained from three independent biological samples. WT, wild type.

(C) Four-week-old plants were infected with powdery mildew pathogen *G. cichoracearum* and the plants were photographed at 8 dpi. WT, wild type.

(D) The number of conidiophores per colony on the infected leaves was calculated at 5 dpi. Bars represent mean and standard deviation (n>30). Statistically significant differences among samples are indicated by lower-case letters (P<0.01; one-way ANOVA). Experiments were repeated three times with similar results.

### Supplemental Figure 11

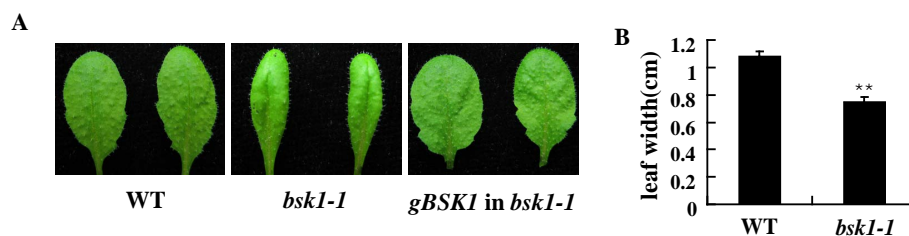

**Supplemental Figure 11. The *bsk1-1* mutant displayed a narrow leaf phenotype.**

(A) Leaves from four-week-old plants grown under standard short-day growth conditions were photographed.

(B) Four-week-old plants were measured for leaf width. Bars represent mean and standard deviation of data derived from samples (n=40).

(\*\*P< 0.01; Student's *t*-test).

Supplemental Figure 12

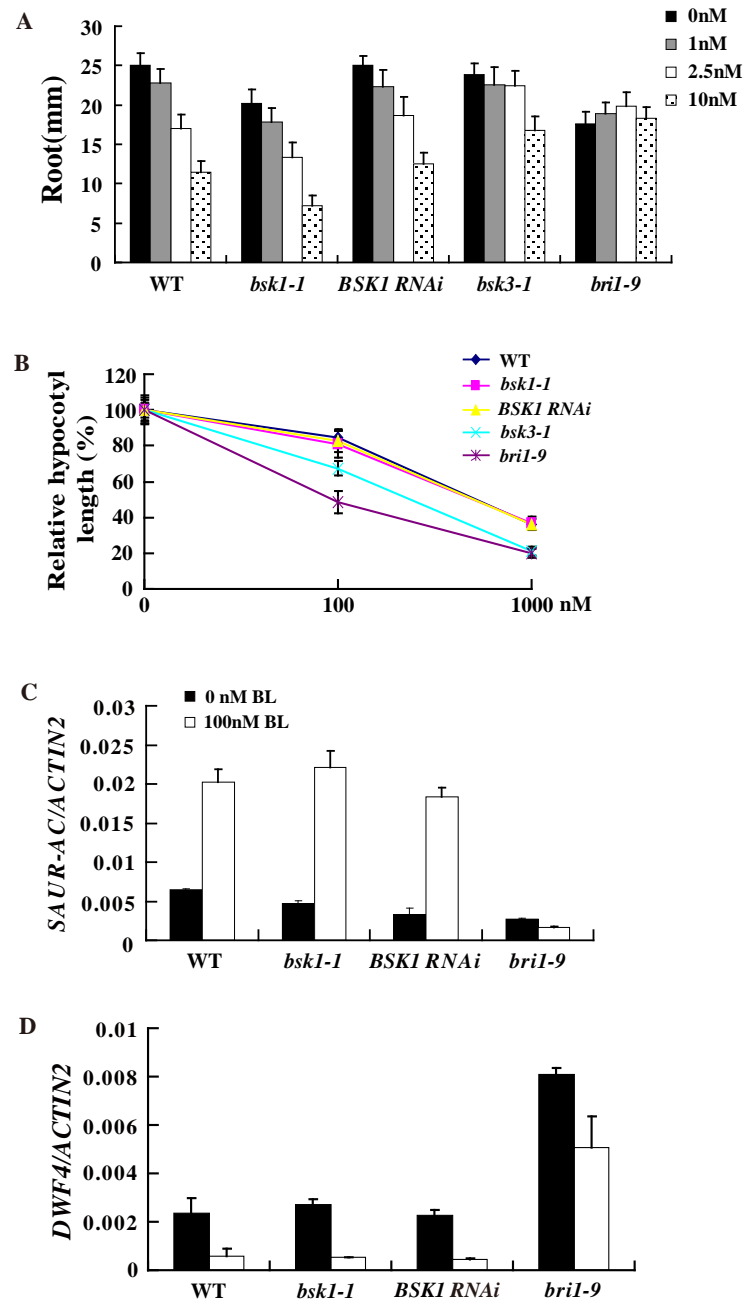Supplemental Figure 12. *bsk1-1* displayed wild type like responses to BL treatment.

(A) Root growth inhibition by BL at indicated concentrations. Wild type, *bsk1-1*, *BSK1 RNAi*, *bsk3-1* and *bri1-9* seedlings were treated with BL for 7 d, and the root length was measured. Data represent mean and standard deviation (n=30). The experiments were repeated three times with similar results. WT, wild type.

(B) Hypocotyl length inhibition by Brassinazole (BRZ). Seedlings grown in the dark were treated with 100 nM or 1  $\mu$ M BRZ for 4 days, and the hypocotyl length was measured. Data represent mean and standard deviation obtained from samples (n=30). Experiments were repeated three times with similar results.

(C) and (D) Expression of *SUA-AC* (C) or *DARF4* (D) in wild type, *bsk1-1*, *BSK1 RNAi* and *bri1-9* seedlings treated with BL. Seedlings were grown on 1/2 MS for 5 days and treated with 0 or 100 nM BL for 2 h. Transcript levels were normalized to internal control *ACTIN2*. Data represent mean and standard deviation from three independent experiments.

### Supplemental Figure 13

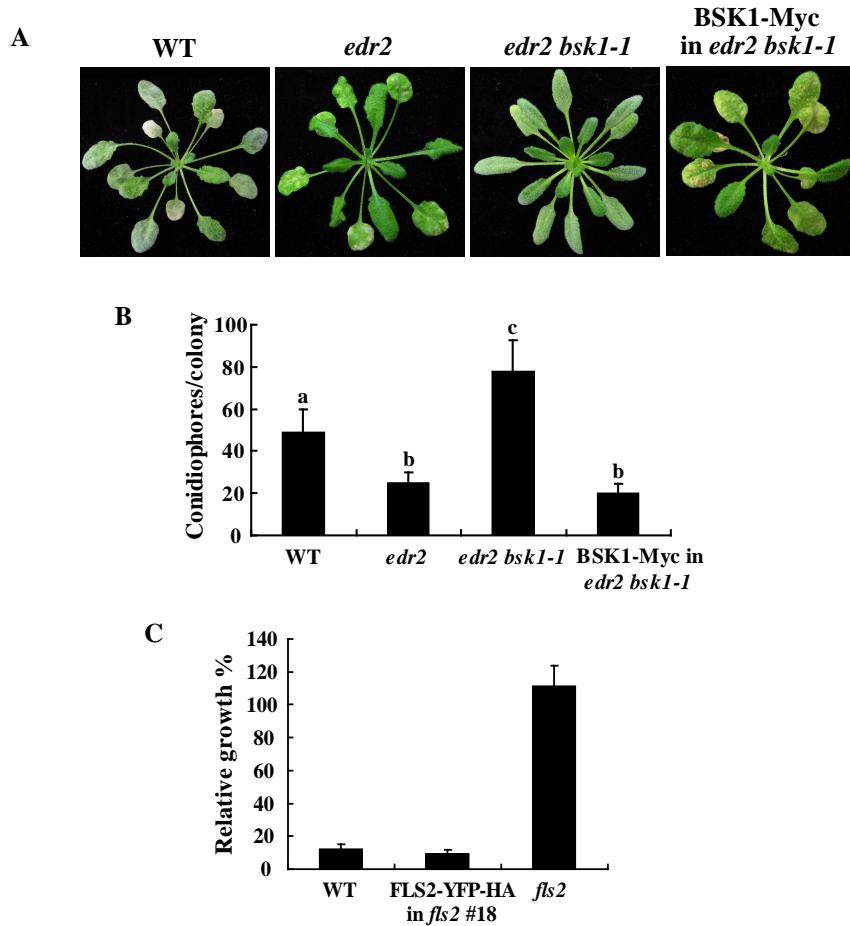

#### Supplemental Figure 13. The BSK1-Myc and FLS2-YFP-HA proteins are functional.

**(A)** Four-week-old Arabidopsis plants were infected with *G. cichoracearum*. The plants were photographed at 8 dpi. The *BSK1-Myc* clone complemented *bsk1-1* phenotype. WT, wild type.

**(B)** The number of conidiophores per colony was counted at 5 dpi. Bars represent mean and standard deviation of data (n>30). Statistically significant differences are indicated by lower-case letters (P< 0.01; one-way ANOVA). The experiments were repeated three times with similar results.

**(C)** The *FLS2-YFP-HA* clone complemented *fls2*-mediated flg22 insensitive phenotype. Five-day-old seedlings were treated with 100 nM flg22 for 10 days.

Data represent mean and standard deviation (n=12). WT, wild type.

The experiments were repeated three times with similar results.

# Supplemental Figure 14

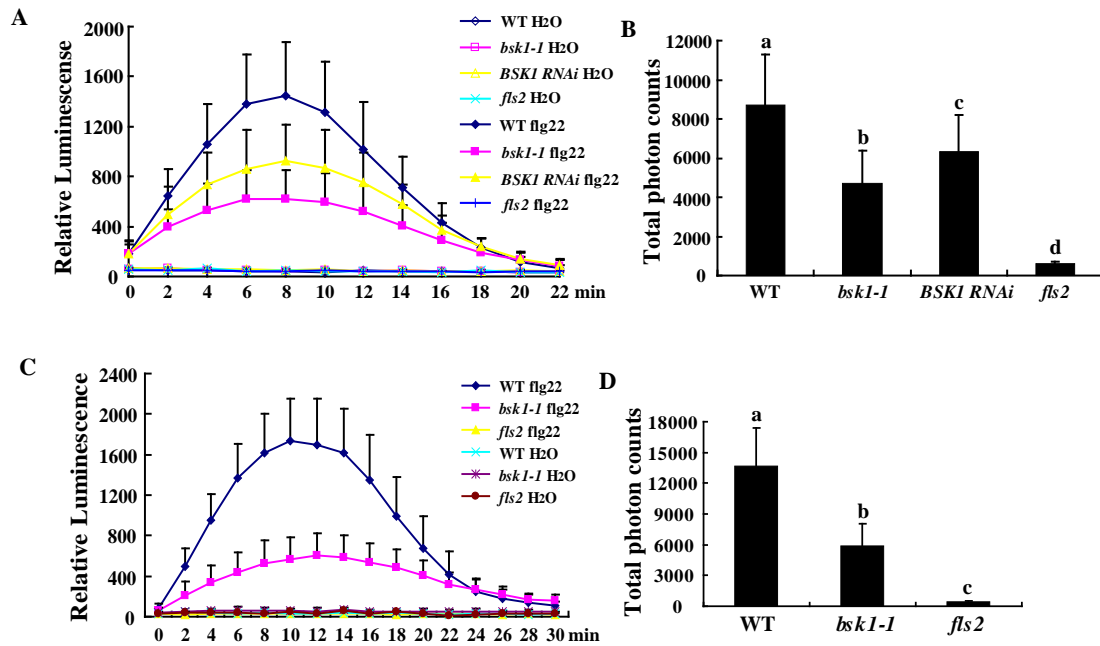

**Supplemental Figure 14. The *BSK1 RNAi* plants showed defects in flg22-induced ROS burst. The *bsk1-1* plants also showed defects in ROS burst when a higher concentration flg22 was used.**

**(A)** Leaves of the wild type, *bsk1-1*, and *BSK1 RNAi* plants were treated with 100 nM flg22, and luminescence was documented at different time points. Bars represent mean and standard deviation obtained from samples (n=12). WT, wild type

**(B)** ROS production was shown by total photon counts during 30 min treatment.

**(C)** Leaves of the *bsk1-1* plants were treated with 1  $\mu$ M flg22. Luminescence was recorded at different time points. Bars represent mean and standard deviation (n=12).

**(D)** ROS production was indicated by total photon counts during 30 min treatment.

**(B)** and **(D)** Bars represent mean and standard deviation of data (n=12). Lower-case letters indicate statistically significant differences ( $P < 0.01$ ; one-way ANOVA).

The experiments were repeated three times with similar results.

Supplemental Figure 15

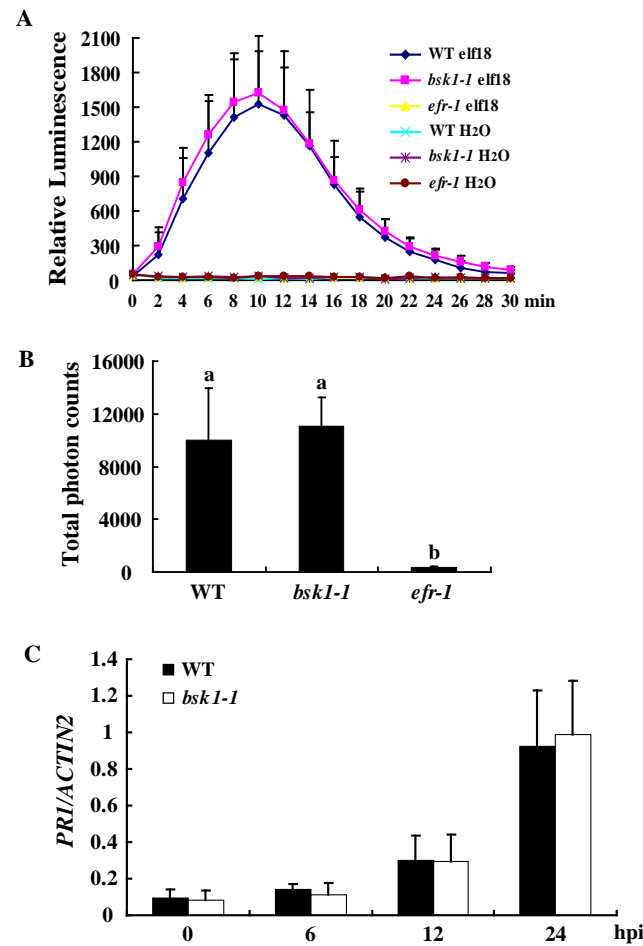

Supplemental Figure 15. The *bsk1-1* plants showed wild type like responses in *elf18*-induced ROS burst and *PR1* accumulation.

(A) Leaves of wild type, *bsk1-1* and *efr-1* were treated with 1  $\mu$ M *elf18*. Luminescence was recorded at different time points. Bars represent mean and standard deviation (n=12).

(B) ROS production was indicated with total photon counts during 30 min of treatment. Bars represent mean and standard deviation (n=12; P < 0.01, one-way ANOVA).

(C) *PR1* accumulation was examined by quantitative real-time PCR after treatment with 1  $\mu$ M *elf18*. *ACTIN2* was used as an internal control. Bars represent mean and standard deviation from three independent experiments.

Supplemental Figure 16

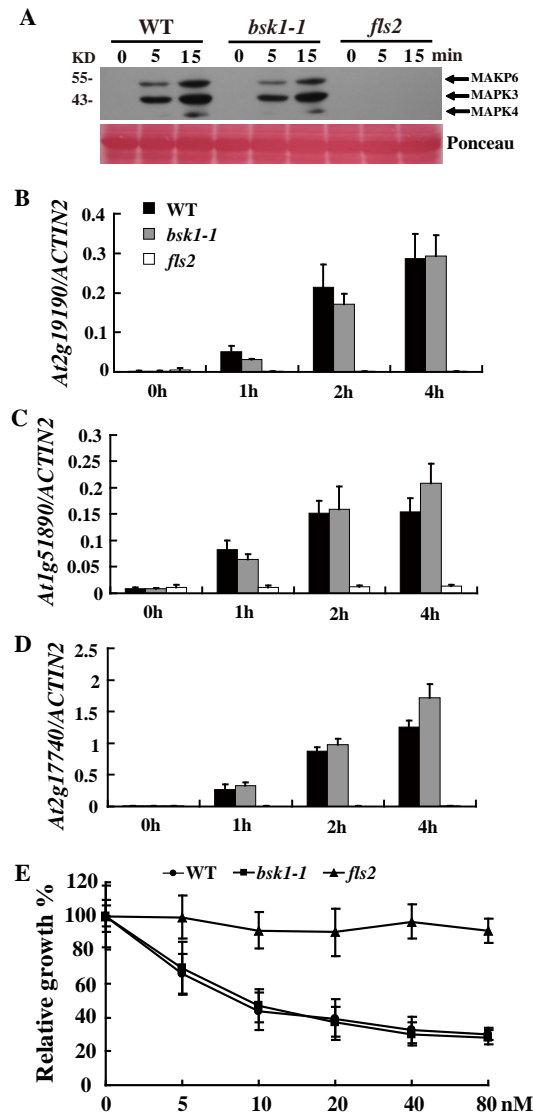

**Supplemental Figure 16. *bsk1-1* showed wild type like MAP kinase activation, expression of PTI marker genes and seedling growth inhibition in response to flg22.**

(A) MAPK activation in the *bsk1-1* seedlings by flg22 is similar to wild type. The seedlings of wild type, *bsk1-1* and *fls2* were treated with 100 nM flg22. The MAPK activity was detected by immunoblot analysis using anti- p44/42-ERK antibody. The individual MAPK kinases are indicated by arrows (upper panel). Ponceau S staining of Rubisco is shown as a loading control (lower panel).

(B)-(D) Relative expression of three PTI marker genes after flg22 treatment. The seedlings were treated with 100 nM flg22, and the accumulation of transcripts of *At2g19190* (B), *At1g51890* (C) and *At2g17740* (D) at different time points was measured by quantitative real-time PCR. *ACTIN2* was used as the internal control. Bars are mean and standard deviation from three independent biological samples.

(E) Seedling growth inhibition triggered by flg22 in WT and *bsk1-1*. Five-day-old seedlings were treated with a relatively low concentration of flg22 for 10 days. The relative growth was documented by comparing fresh weights of treated seedlings with those of the untreated control. Data represent mean and standard deviation (n=12). The experiments were repeated at least three times with similar results.

**Supplemental Table 1**

List of Primers Used in this Study.

| Primer name                   | Purpose                      | Sequence (5' to 3')                                                        |
|-------------------------------|------------------------------|----------------------------------------------------------------------------|
| 158g FP                       | complementation              | GAGACAGCTCTTGTGTTCTTGAAA                                                   |
| 158g RP                       | complementation              | AAGTTGATGATAATGAAGCACCG                                                    |
| <i>bsk1-1d</i> CAPS-HaeIII FP | genotyping                   | GGTTATGGTTAAAGCCAGATTTG                                                    |
| <i>bsk1-1d</i> CAPS-HaeIII RP | genotyping                   | GCATAGTAAGTAGCATAGACTTGGC                                                  |
| BSK1-RNAi FP                  | RNAi construct               | CATCTAGACTCGAGGCCTGCTCAAGAATGGATCTCAC                                      |
| BSK1-RNAi RP                  | RNAi construct               | CAAAGCTTGAATTCCTTCGAGCTGAGCTGCTTCGTTT                                      |
| BSK1-attB1                    | gateway cloning              | GGGGACAAGTTTGTACAAAAAAGCAGGCTTCGAA<br>GGAGATAGAACCATGGGTTGTTGTCAATCCTTGTTT |
| BSK1-attB2                    | gateway cloning              | GGGGACCACTTTGTACAAGAAAGCTGGGTCAGAT<br>CCTCTGCCGCCTCGTTGT                   |
| BSK1 G2A-attB1                | gateway cloning              | GGGGACAAGTTTGTACAAAAAAGCAGGCTTCGAA<br>GGAGATAGAACCATGGCTTGTTGTCAATCCTTGTTT |
| FLS2-attB1                    | gateway cloning              | GGGGACAAGTTTGTACAAAAAAGCAGGCTTCGAA<br>GGAGATAGAACCATGAAGTTACTCTCAAAGACCTT  |
| FLS2-attB2                    | gateway cloning              | GGGGACCACTTTGTACAAGAAAGCTGGGTCAACTT<br>CTCGATCCTCGTTACGAT                  |
| BAK1-attB1                    | gateway cloning              | GGGGACAAGTTTGTACAAAAAAGCAGGCTTCGAA<br>GGAGATAGAACCATGGAACGAAGATTAATGATCC   |
| BAK1-attB2                    | gateway cloning              | GGGGACCACTTTGTACAAGAAAGCTGG<br>GTCTCTTGGACCCGAGGGGTATTC                    |
| pMAL-BSK1 FP                  | <i>in vitro</i> kinase assay | CTGGATCCATGGGTTGTTGTCAATCCTTGTT                                            |
| pMAL-BSK1 RP                  | <i>in vitro</i> kinase assay | CTGAATTCTCAAGATCCTCTGCCGCCTC                                               |
| K104E FP                      | site-directed mutagenesis    | CGTCGTTGGATCGCTGTCGAGAAGTTTACTAAGATGG                                      |
| K104E RP                      | site-directed mutagenesis    | CCATCTTAGTAACTTCTCGACAGCGATCCAACGACG                                       |
| S230A FP                      | site-directed mutagenesis    | GGGATGGTAAAAGTTATGCCACAAATTTAGCTTATACAC                                    |
| S230A RP                      | site-directed mutagenesis    | GTGTATAAGCTAAATTTGTGGCATAACTTTTACCATCCC                                    |
| BSK1-NP FP                    | GFP localization             | CCTTAATTAAGAGACAGCTCTTGTGTTCTTGAAA                                         |
| BSK1-NP RP                    | GFP localization             | CTGAGCTCGAGAGAAAGAGTTGATAGTGGTCG                                           |
| BSK1-CDS FP                   | GFP localization             | CTGAGCTCATGGGTTGTTGTCAATCCTTGTTT                                           |
| BSK1-CDS RP                   | GFP localization             | CTACCGGTAGAGATCCTCTGCCGCCTCGTTGT                                           |
| BSK1-RT FP                    | real-time PCR                | GAGCCTCGAGAGAGACCAAATAC                                                    |
| BSK1-RT RP                    | real-time PCR                | CCTCACCTAATGGCGAAAGTGG                                                     |
| PR1-RT FP                     | real-time PCR                | TTCACAACCAGGCACGAGGAG                                                      |
| PR1-RT RP                     | real-time PCR                | CTAACCCACATGTTACGGCG                                                       |
| PR2-RT FP                     | real-time PCR                | GAATCAAGGAGCTTAGCCTCACC                                                    |
| PR2-RT RP                     | real-time PCR                | GTAGAGCCGCATTTCGCTGGAT                                                     |
| PAD4-RT FP                    | real-time PCR                | CTTTCTTCAGTTAAAGATCAAGGAAGG                                                |
| PAD4-RT RP                    | real-time PCR                | GGCAGAAGTTGTGTGCTAAACG                                                     |
| SID2-RTFP                     | real-time PCR                | CGCAAGAAGTATGAGTCATGTTTCG                                                  |
| SID2-RT RP                    | real-time PCR                | AACCTGTAACCGAACGACGC                                                       |
| FMO1-RT FP                    | real-time PCR                | CTCTCTTCTGCGTGCCGTAGTT                                                     |
| FMO1-RTRP                     | real-time PCR                | ATCCCTTTATCCGCTTCCTCAA                                                     |
| ACTIN2-RT FP                  | real-time PCR                | TCTCCCGCTATGTATGTCGCC                                                      |
| ACTIN2-RT RP                  | real-time PCR                | GTCACGTCCAGCAAGGTCAAGA                                                     |
